# Supplementary material for: A new metriacanthosaurid theropod dinosaur from the Middle Jurassic of Yunnan Province, China
Source: PeerJ journal article supplement (doi:10.7717/peerj.19218), 2025-04-02

# Supplemental File S2

Characters mapping of the equally weighting strict consensus tree, all character numbers should be added one, because this is exported directly from TNT v1.6.

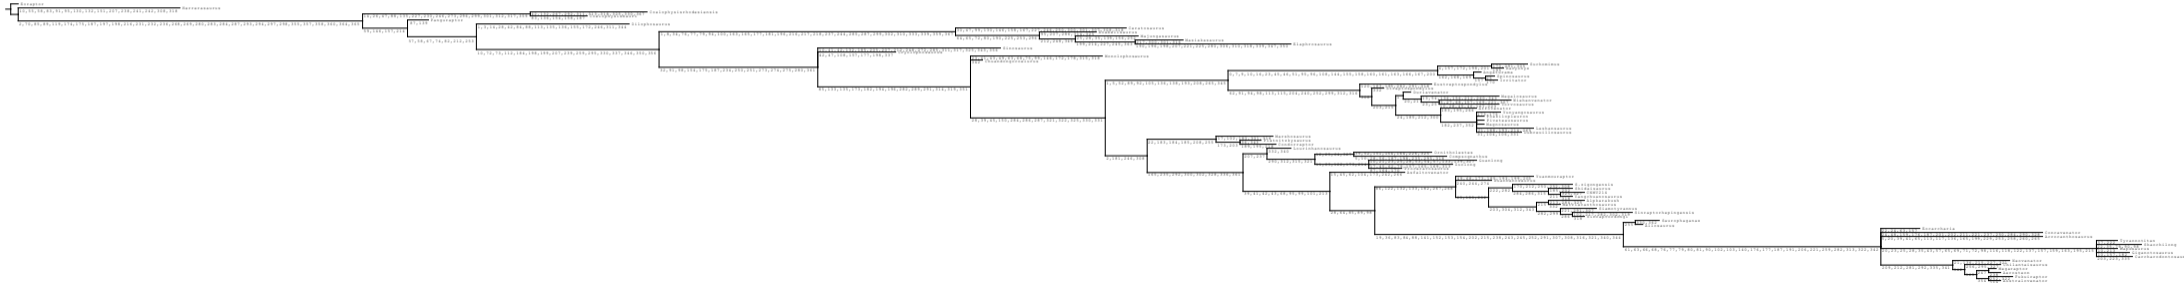

Supplement: Supplemental_File_S2.pdf [file Supplemental_File_S2.pdf]
